# Supplementary material for: Neurological Manifestations of Autosomal Dominant Alzheimer’s Disease from the DIAN cohort and a meta-analysis
Source: PubMed Central journal article supplement — Lancet Neurol. Author manuscript; Available in PMC 2017 Dec 1. (PMC5116769; doi:10.1016/s1474-4422(16)30229-0), 2016-10-21
Supplement: NIHMS827342-supplement-01.pdf [file NIHMS827342-supplement-01.pdf]

**Supplemental Table 1. Symptoms in the DIAN cohort, with UDS terms and descriptions**

| Symptom                               | Section                                                                                                                                                              | Description                                                                                                                                                                                                                                                                                                                                                                                                                                                                                                                                                                                                                                                                                                        |
|---------------------------------------|----------------------------------------------------------------------------------------------------------------------------------------------------------------------|--------------------------------------------------------------------------------------------------------------------------------------------------------------------------------------------------------------------------------------------------------------------------------------------------------------------------------------------------------------------------------------------------------------------------------------------------------------------------------------------------------------------------------------------------------------------------------------------------------------------------------------------------------------------------------------------------------------------|
| <b>Parkinsonism</b>                   | UDS B9: Clinician Judgment of Symptoms                                                                                                                               | 12a. If there were changes in motor function, were these suggestive of parkinsonism?                                                                                                                                                                                                                                                                                                                                                                                                                                                                                                                                                                                                                               |
| <b>Myoclonus</b>                      | UDS B3: UPDRS; Neurological Exam                                                                                                                                     | Mentioned specifically in commentary                                                                                                                                                                                                                                                                                                                                                                                                                                                                                                                                                                                                                                                                               |
| <b>Seizures</b>                       | UDS A5: Subject Health History                                                                                                                                       | a. Seizures (recent/active only)                                                                                                                                                                                                                                                                                                                                                                                                                                                                                                                                                                                                                                                                                   |
| <b>Spasticity</b>                     | UDS B3: UPDRS; Neurological exam                                                                                                                                     | Mentioned specifically in commentary                                                                                                                                                                                                                                                                                                                                                                                                                                                                                                                                                                                                                                                                               |
| <b>Corticobulbar deficits</b>         | UDS B3: UPDRS; Neurological Exam                                                                                                                                     | Mentioned specifically in commentary                                                                                                                                                                                                                                                                                                                                                                                                                                                                                                                                                                                                                                                                               |
| <b>Cerebellar ataxia</b>              | UDS B3: UPDRS<br>Neurological Exam                                                                                                                                   | Mentioned specifically in commentary<br>Impaired finger-nose-finger or heel-shin, excluding instances of limited comprehension, limb weakness, or confounding apraxia                                                                                                                                                                                                                                                                                                                                                                                                                                                                                                                                              |
| <b>Aphasia</b>                        | UDS B9: Clinician Judgment of Symptoms                                                                                                                               | 4c. Language (For example, does s/he have hesitant speech; have trouble finding words; use inappropriate words without self-correction?)                                                                                                                                                                                                                                                                                                                                                                                                                                                                                                                                                                           |
| <b>Apraxia</b>                        | UDS B3: UPDRS; Neurological exam                                                                                                                                     | Mentioned specifically in commentary                                                                                                                                                                                                                                                                                                                                                                                                                                                                                                                                                                                                                                                                               |
| <b>Visual agnosia</b>                 | UDS B9: Clinician Judgment of Symptoms                                                                                                                               | 4d. Visuospatial function (Difficulty interpreting visual stimuli and finding his/her way around.)                                                                                                                                                                                                                                                                                                                                                                                                                                                                                                                                                                                                                 |
| <b>Hallucinations</b>                 | UDS B9: Clinician Judgment of Symptoms<br>UDS B9: Clinician Judgment of Symptoms                                                                                     | 7c. 1) Psychosis: Visual hallucinations<br>7c. 2) Psychosis: Auditory hallucinations                                                                                                                                                                                                                                                                                                                                                                                                                                                                                                                                                                                                                               |
| <b>Behavioral/personality changes</b> | UDS B9: Clinician Judgment of Symptoms<br>UDS B9: Clinician Judgment of Symptoms<br>UDS B9: Clinician Judgment of Symptoms<br>UDS B9: Clinician Judgment of Symptoms | 7d. Disinhibition (Does the subject use inappropriate coarse language or exhibit inappropriate speech or behaviors in public or in the home? Does s/he talk personally to strangers or have disregard for personal hygiene?)<br>7e. Irritability (Does the subject overreact, such as shouting at family members or others?)<br>7f. Agitation (Does the subject have trouble sitting still; does s/he shout, hit, and/or kick?)<br>7g. Personality change (Does the subject exhibit bizarre behavior or behavior uncharacteristic of the subject, such as unusual collecting, suspiciousness [without delusions], unusual dress, or dietary changes? Does the subject fail to take other's feelings into account?) |
| <b>Stroke</b>                         | UDS B2: HIS and CVD                                                                                                                                                  | 6. History of stroke (recent/active only)                                                                                                                                                                                                                                                                                                                                                                                                                                                                                                                                                                                                                                                                          |
